# Supplementary material for: Elderly suicide trends in the context of transforming China, 1987–2014
Source: PubMed Central journal article supplement (PMC5123573; doi:10.1038/srep37724), 2016-11-25
Supplement: srep37724-s1.pdf [file srep37724-s1.pdf]

## **Elderly suicide trends in the context of transforming China, 1987-2014**

Bao-Liang Zhong<sup>1,2</sup>, Helen F. K. Chiu<sup>1\*</sup>, and Yeates Conwell<sup>3</sup>

<sup>1</sup> Department of Psychiatry, The Chinese University of Hong Kong, Hong Kong SAR, China.

<sup>2</sup> Affiliated Mental Health Center, Tongji Medical College of Huazhong University of Science and Technology, Wuhan, Hubei, China.

<sup>3</sup> Department of Psychiatry, University of Rochester Medical Center, Rochester, New York, USA.

\* Correspondence and requests for materials should be addressed to H.C. (email: [helenchiu@cuhk.edu.hk](mailto:helenchiu@cuhk.edu.hk))

**Supplementary Table S1. Suicide rates (1/100000) by residence (rural/urban), gender, and 5-year old age-group in China, 1987-2014**

| Year | Gender | Residence | Old age-group |       |        |        |        |
|------|--------|-----------|---------------|-------|--------|--------|--------|
|      |        |           | 65-69         | 70-74 | 75-79  | 80-84  | 85+    |
| 1987 | Male   | 1         | 21.84         | 29.76 | 35.58  | 54.10  | 56.08  |
| 1988 | Male   | 1         | 24.63         | 32.55 | 49.57  | 70.03  | 69.19  |
| 1989 | Male   | 1         | 27.35         | 34.65 | 46.78  | 73.96  | 104.90 |
| 1990 | Male   | 1         | 20.45         | 32.63 | 50.28  | 62.12  | 103.91 |
| 1991 | Male   | 1         | 22.34         | 34.10 | 47.02  | 64.35  | 72.24  |
| 1992 | Male   | 1         | 19.80         | 30.58 | 34.01  | 48.48  | 71.01  |
| 1993 | Male   | 1         | 16.53         | 20.33 | 34.28  | 49.27  | 51.79  |
| 1994 | Male   | 1         | 13.66         | 21.94 | 32.96  | 43.82  | 53.33  |
| 1995 | Male   | 1         | 13.58         | 24.88 | 37.78  | 48.97  | 48.37  |
| 1996 | Male   | 1         | 14.36         | 23.32 | 33.73  | 39.59  | 64.98  |
| 1997 | Male   | 1         | 13.56         | 23.65 | 32.22  | 45.91  | 39.29  |
| 1998 | Male   | 1         | 13.54         | 21.46 | 31.41  | 41.65  | 43.01  |
| 1999 | Male   | 1         | 13.53         | 20.95 | 33.69  | 48.11  | 53.14  |
| 2000 | Male   | 1         | 13.59         | 19.54 | 26.48  | 36.51  | 38.25  |
| 2001 | Male   | 1         | 11.51         | 13.76 | 22.61  | 40.33  | 37.50  |
| 2002 | Male   | 1         | 45.59         | 65.84 | 93.22  | 127.78 | 193.48 |
| 2003 | Male   | 1         | 35.91         | 51.41 | 72.97  | 87.53  | 89.34  |
| 2004 | Male   | 1         | 21.24         | 36.29 | 33.10  | 62.02  | 53.64  |
| 2005 | Male   | 1         | 44.20         | 78.90 | 111.95 | 139.39 | 105.99 |
| 2006 | Male   | 1         | 11.21         | 18.16 | 21.89  | 34.75  | 57.37  |
| 2007 | Male   | 1         | 8.26          | 17.02 | 16.72  | 27.75  | 28.64  |
| 2008 | Male   | 1         | 7.52          | 9.02  | 10.85  | 16.00  | 16.82  |
| 2009 | Male   | 1         | 11.54         | 15.31 | 23.72  | 31.76  | 34.34  |
| 2010 | Male   | 1         | 17.27         | 29.25 | 39.88  | 68.88  | 117.48 |
| 2011 | Male   | 1         | 9.86          | 15.97 | 24.14  | 42.83  | 45.08  |
| 2012 | Male   | 1         | 11.83         | 17.35 | 25.83  | 32.92  | 35.19  |
| 2013 | Male   | 1         | 13.79         | 17.15 | 23.39  | 34.90  | 40.02  |
| 2014 | Male   | 1         | 15.06         | 19.37 | 24.08  | 28.56  | 57.34  |
| 1987 | Female | 1         | 30.93         | 46.97 | 55.38  | 79.01  | 50.25  |
| 1988 | Female | 1         | 20.24         | 32.60 | 42.90  | 57.57  | 74.58  |
| 1989 | Female | 1         | 22.72         | 32.15 | 37.56  | 53.39  | 73.18  |
| 1990 | Female | 1         | 17.54         | 23.76 | 39.36  | 56.62  | 51.52  |
| 1991 | Female | 1         | 18.35         | 28.22 | 39.54  | 50.59  | 53.67  |
| 1992 | Female | 1         | 19.35         | 26.58 | 32.81  | 48.65  | 62.37  |
| 1993 | Female | 1         | 15.34         | 20.36 | 28.84  | 46.36  | 44.00  |
| 1994 | Female | 1         | 12.06         | 21.43 | 28.89  | 32.50  | 46.14  |
| 1995 | Female | 1         | 15.98         | 22.06 | 29.61  | 39.33  | 41.63  |

|      |        |   |       |        |        |        |        |
|------|--------|---|-------|--------|--------|--------|--------|
| 1996 | Female | 1 | 13.52 | 21.49  | 27.79  | 35.14  | 30.90  |
| 1997 | Female | 1 | 9.75  | 16.73  | 26.55  | 34.39  | 39.60  |
| 1998 | Female | 1 | 13.91 | 25.24  | 24.39  | 37.31  | 30.65  |
| 1999 | Female | 1 | 14.65 | 20.49  | 23.61  | 34.04  | 29.58  |
| 2000 | Female | 1 | 12.24 | 16.37  | 24.57  | 27.50  | 33.84  |
| 2001 | Female | 1 | 11.22 | 13.99  | 20.76  | 26.00  | 27.60  |
| 2002 | Female | 1 | 25.33 | 46.65  | 67.10  | 78.80  | 98.90  |
| 2003 | Female | 1 | 26.46 | 32.34  | 53.13  | 73.18  | 66.83  |
| 2004 | Female | 1 | 22.61 | 27.92  | 32.99  | 36.03  | 59.65  |
| 2005 | Female | 1 | 38.76 | 62.93  | 83.91  | 119.78 | 96.72  |
| 2006 | Female | 1 | 8.08  | 10.87  | 15.72  | 22.42  | 28.84  |
| 2007 | Female | 1 | 8.43  | 11.59  | 13.28  | 19.91  | 19.53  |
| 2008 | Female | 1 | 4.78  | 5.89   | 8.63   | 13.16  | 12.16  |
| 2009 | Female | 1 | 8.41  | 11.34  | 17.97  | 28.06  | 29.05  |
| 2010 | Female | 1 | 13.88 | 20.98  | 26.65  | 48.47  | 71.95  |
| 2011 | Female | 1 | 9.85  | 12.19  | 24.07  | 32.57  | 34.94  |
| 2012 | Female | 1 | 9.19  | 12.56  | 18.79  | 25.18  | 30.50  |
| 2013 | Female | 1 | 9.58  | 12.41  | 15.12  | 25.10  | 22.28  |
| 2014 | Female | 1 | 10.65 | 12.56  | 15.42  | 23.29  | 30.61  |
| 1987 | Male   | 2 | 74.32 | 106.47 | 97.51  | 120.35 | 144.28 |
| 1988 | Male   | 2 | 65.75 | 107.72 | 111.51 | 148.18 | 173.44 |
| 1989 | Male   | 2 | 70.06 | 108.54 | 124.02 | 170.65 | 159.99 |
| 1990 | Male   | 2 | 64.05 | 104.38 | 116.61 | 165.48 | 196.56 |
| 1991 | Male   | 2 | 76.06 | 136.72 | 127.40 | 154.56 | 166.50 |
| 1992 | Male   | 2 | 75.81 | 131.46 | 137.96 | 155.44 | 162.23 |
| 1993 | Male   | 2 | 75.41 | 125.65 | 136.61 | 172.75 | 150.94 |
| 1994 | Male   | 2 | 76.83 | 139.25 | 127.27 | 172.80 | 147.87 |
| 1995 | Male   | 2 | 69.33 | 112.01 | 110.70 | 163.11 | 131.18 |
| 1996 | Male   | 2 | 64.00 | 94.00  | 124.07 | 148.04 | 139.19 |
| 1997 | Male   | 2 | 77.91 | 127.41 | 126.99 | 155.53 | 143.03 |
| 1998 | Male   | 2 | 79.76 | 137.95 | 154.08 | 202.01 | 173.22 |
| 1999 | Male   | 2 | 66.83 | 109.06 | 131.36 | 149.98 | 153.03 |
| 2000 | Male   | 2 | 68.49 | 106.27 | 111.17 | 154.25 | 147.80 |
| 2001 | Male   | 2 | 70.43 | 101.18 | 122.03 | 161.01 | 133.65 |
| 2002 | Male   | 2 | 54.48 | 77.66  | 107.23 | 132.65 | 137.11 |
| 2003 | Male   | 2 | 59.24 | 88.55  | 109.67 | 130.79 | 101.42 |
| 2004 | Male   | 2 | 33.47 | 53.12  | 53.33  | 123.32 | 94.48  |
| 2005 | Male   | 2 | 39.82 | 46.00  | 74.23  | 96.54  | 77.12  |
| 2006 | Male   | 2 | 29.67 | 45.01  | 58.04  | 87.89  | 83.46  |
| 2007 | Male   | 2 | 34.27 | 51.69  | 67.46  | 103.51 | 127.97 |
| 2008 | Male   | 2 | 27.32 | 31.46  | 47.19  | 68.40  | 106.10 |
| 2009 | Male   | 2 | 26.48 | 43.21  | 64.07  | 90.31  | 130.25 |
| 2010 | Male   | 2 | 29.19 | 51.44  | 88.71  | 151.03 | 256.81 |

|      |        |   |       |       |        |        |        |
|------|--------|---|-------|-------|--------|--------|--------|
| 2011 | Male   | 2 | 29.57 | 41.69 | 50.99  | 104.13 | 148.44 |
| 2012 | Male   | 2 | 21.64 | 29.90 | 47.50  | 64.93  | 92.21  |
| 2013 | Male   | 2 | 25.47 | 37.05 | 53.66  | 73.17  | 95.03  |
| 2014 | Male   | 2 | 25.31 | 35.46 | 49.16  | 67.51  | 93.54  |
| 1987 | Female | 2 | 61.03 | 83.15 | 76.10  | 114.77 | 148.39 |
| 1988 | Female | 2 | 57.98 | 78.16 | 81.48  | 102.17 | 129.19 |
| 1989 | Female | 2 | 58.41 | 76.75 | 87.41  | 96.09  | 44.33  |
| 1990 | Female | 2 | 43.30 | 61.45 | 61.74  | 82.49  | 102.49 |
| 1991 | Female | 2 | 64.52 | 89.43 | 96.96  | 121.24 | 131.87 |
| 1992 | Female | 2 | 54.50 | 74.03 | 80.98  | 84.69  | 119.30 |
| 1993 | Female | 2 | 61.45 | 95.78 | 96.76  | 94.05  | 93.95  |
| 1994 | Female | 2 | 57.90 | 97.68 | 91.24  | 108.66 | 113.94 |
| 1995 | Female | 2 | 54.73 | 85.57 | 91.41  | 125.13 | 126.02 |
| 1996 | Female | 2 | 57.23 | 91.25 | 88.07  | 119.38 | 126.11 |
| 1997 | Female | 2 | 64.48 | 89.00 | 97.75  | 125.40 | 111.77 |
| 1998 | Female | 2 | 63.51 | 95.94 | 103.06 | 124.29 | 83.31  |
| 1999 | Female | 2 | 58.55 | 86.23 | 89.56  | 115.16 | 117.37 |
| 2000 | Female | 2 | 48.92 | 80.65 | 93.77  | 115.46 | 113.50 |
| 2001 | Female | 2 | 54.85 | 82.85 | 105.72 | 125.34 | 156.57 |
| 2002 | Female | 2 | 31.67 | 47.62 | 77.86  | 72.73  | 101.58 |
| 2003 | Female | 2 | 50.33 | 64.13 | 77.86  | 72.73  | 101.58 |
| 2004 | Female | 2 | 26.86 | 37.10 | 64.86  | 66.86  | 114.32 |
| 2005 | Female | 2 | 38.35 | 39.33 | 56.30  | 71.93  | 111.71 |
| 2006 | Female | 2 | 22.91 | 27.82 | 40.08  | 51.59  | 69.61  |
| 2007 | Female | 2 | 22.67 | 30.23 | 48.85  | 75.13  | 81.08  |
| 2008 | Female | 2 | 13.60 | 22.76 | 36.40  | 41.28  | 42.47  |
| 2009 | Female | 2 | 20.80 | 27.34 | 43.80  | 74.78  | 91.90  |
| 2010 | Female | 2 | 24.81 | 37.31 | 52.30  | 79.49  | 159.70 |
| 2011 | Female | 2 | 21.47 | 28.87 | 42.39  | 60.52  | 63.76  |
| 2012 | Female | 2 | 17.83 | 23.20 | 39.79  | 43.79  | 58.72  |
| 2013 | Female | 2 | 18.59 | 24.79 | 35.27  | 48.38  | 58.92  |
| 2014 | Female | 2 | 17.52 | 26.50 | 35.53  | 46.62  | 56.19  |
